# Supplementary material
Source: PubMed Central journal article supplement (PMC2781475)
Supplement: supp_M109.034652_jbc.M109.034652-1.pdf [file supp_M109.034652_jbc.M109.034652-1.pdf]

Figure S1

MTH1691 MPDINESMLNQFRPVIRR-FIDPIAD---RIALPADYITLTGFLVACAASAGYASGSLIT  
PFU0462 -----MLSNLRPLAKK-PLEKIAEPFSKLGITPNQLTMVGFFLSLLASYEYLLNNQVF  
SSO0556 ----MVSMLTRIRROIKR-VIEPLAKTLAQLKVSANFITMLGLIFAIVYYFEIMRSNTTL  
APE1526 ----MGVFNRLRSFYEARIAPTVASFLSRISPDPNITYTLASPVAAAAALPAWLYISPVA  
TBHG02550 ----MSKLPFLSRAAFARITTPIARGLLRVGLTPDVVTILGTTASVAGALTFLFPMGKLF  
SCEPIS1 -----MSSNSTPEKVTAEHVLWYIPNKIGYVRVITAALSFFVMKNHPTAF

. : .:

MTH1691 G-AALLAASGFIDVLDGAVARRRFRPTAFGGFLDSTLDRLSD-----GIIIGITAGGF  
PFU0462 G-SLILLGAFLDALDGSLARLTGRVTKFGGFLDSTMDRLSD-----AAIFGIALGEL  
SSO0556 G-IIFLVFSALMDAIDGEVARVSKTVSPLGSLDSTLDRIED-----ILYISAFIFLGF  
APE1526 S-LLLIALLSLLLD~~AVD~~GAVARFTGRVSPLGSLDSSLDRLSD-----SLYHATLYIAGV  
TBHG02550 AGACVWVFFVFLDMLDGAMARERGGGTRFGAVLDATCDRISDGAVFCGLLWWIAFHMRDR  
SCEPIS1 T--WLYSTSCLLDALDGTMARKYNQVSSLGAVLDMVTDRSST-----AGLMCFLCVQYP

. ::\* :\*\* :\*\* : :\*..\*\* \*\* . :

MTH1691 TGLLTGLLALHSGLMVSYVRARAESLG-IECAVGIAERAERIIIIILAGSLAGYL---IHP  
PFU0462 VNWKVAFLALIGSYMVSYTRCRAELAGSGTLAVGIAERGERLLIILVIAGLFG-----  
SSO0556 SSVLVAVIAGLS-LTISYIRAKAESLGLKMEGRGIERGERIIFVVFVILLLYII---VSK  
APE1526 H-PLIVIAMLSGGLIVPYLRKAGESLGLEVRGRGLMERGERSIAILAILAIS-I---YNL  
TBHG02550 PLVIATLICLVTSQVISYIKARAEASG-LRGDGGFIERPERLIIVLTGAGVSDFPFVWP  
SCEPIS1 QWCVFFQLMLGLDITSHYMHMYASLSAGKTSKSVGEGESRLLHLYYTRRDVLFITICAFN

\* : .. . .. \* .\* : :

MTH1691 WFMDAAIIVLAALG-----YFTMIQRMIVWQRLK-----  
PFU0462 -IIDIGVYLVAALS-----WITFLQRVYEAKKRLEK-----  
SSO0556 QVSLYLFYLFMLLT-----AITVIQRFYAVYSLLRK-----  
APE1526 QTALALASAAAVLV-----WITVIQRMVYIAGELRR-----  
TBHG02550 PALSVGMWLLAVAS-----VITCVQRLHTVWTS~~PGA~~IDRMAIPGKGDR-----  
SCEPIS1 ELFYAGLYLQLFSNSATFGKWTIIISFPGYVFKQTANVVQLKRAALILADNDAKNANEKN

\* :.

MTH1691 ---  
PFU0462 ---  
SSO0556 ---  
APE1526 ---  
TBHG02550 ---  
SCEPIS1 KTY

Supplemental Figure S1

**Multiple alignment of AIP Synthase and PI Synthase.** A gene (MTH1691) homologous to the yeast PI synthase gene was identified in the *M. thermautotrophicus* genome. The gene MTH1691 was tentatively annotated as AIP synthase. The amino acid sequence data of MTH1691, *M. thermautotrophicus* (NP\_276802)(195 amino acids); PFU0462, *Pyrococcus furiosus* (NP\_578191) (187 amino acids); SSO0556, *Sulfolobus solfataricus* (AAK40873)(195 amino acids); APE1526, *Aeropyrum pernix* (NP\_148000)(194 amino acids); TBHG02550, *Mycobacterium tuberculosis* (YP\_002159588)(217 amino acids); SCEPIS1, *Saccharomyces cerevisiae* (NP\_015438)(220 amino acids) were obtained from the NCBI site ([WWW.ncbi.nih.gov](http://WWW.ncbi.nih.gov)). Multiple alignment of the six sequences was constructed using the alignment software CLUSTAL W 1.83. Underlined sequences are CDP-alcohol phosphatidyltransferase motif.
